# Supplementary material for: Noninvasive Ventilation in Preterm Infants: Factors Influencing Weaning Decisions and the Role of the Silverman-Andersen Score
Source: MDPI journal article supplement (doi:10.3390/children9091292), 2022-08-26
Supplement: s1 [file s1]

## Evaluation of influence factors and the role of the Silverman-Andersen-Score during weaning of preterm neonates from noninvasive ventilation

### Supplemental Methods

#### *Respirators and Interfaces*

The following respirators are routinely used on our NICU for noninvasive ventilation of preterm neonates:

- Stephanie (Fritz Stephan GmbH, Gackebach, Germany)
- Sophie (Fritz Stephan GmbH)
- Servo-i (Getinge Deutschland GmbH, Rastatt, Germany)

In combination with the following interfaces:

- binasal prong (Easy Flow nCPAP Prong; Fritz Stephan GmbH)
- nasal mask (Easy Flow nCPAP Maske; Fritz Stephan GmbH)

For HHHFNC a heated humidifier (MR850; Fisher&Paykel HealthCare GmbH, Schorndorf, Germany) in combination with Optiflow Junior 2 Nasal Cannula (Fisher&Paykel) is used.

#### Standard initial settings for different NIV modes

|                   | sNIPPV                                          | nCPAP                          | HHHFNC                                             | NAVA                                                      |
|-------------------|-------------------------------------------------|--------------------------------|----------------------------------------------------|-----------------------------------------------------------|
| Respirator/Device | Stephanie/Sophie                                | Stephanie/Sophie               | Fisher-Paykel                                      | Servo-i                                                   |
| PEEP              | 5 (-7) cmH <sub>2</sub> O                       | 5 (-7) cmH <sub>2</sub> O      | Regulated by flow depending on weight (~5-7 l/min) | 5 (-7) cmH <sub>2</sub> O                                 |
| PIP               | 15-20 cmH <sub>2</sub> O                        | --                             | --                                                 | Regulated by NAVA-level (1-2 cmH <sub>2</sub> O/ $\mu$ V) |
| Inspiration time  | 0.3 s                                           | --                             | --                                                 | --                                                        |
| Frequency         | 50-60/min                                       | --                             | --                                                 | --                                                        |
| V'max             | 10-12 l/min (range 6-20 l/min)                  | 10-12 l/min (range 6-20 l/min) | 5-7l/min                                           | regulated by respirator (max. 25l/min)                    |
| Trigger           | External trigger (abdominal respiratory sensor) | n.a.                           | n.a.                                               | Electrical activity of the diaphragm (Edi)                |
| Trigger level     | 0.5 (AU)                                        | n.a.                           | n.a.                                               | 0.5 $\mu$ V                                               |

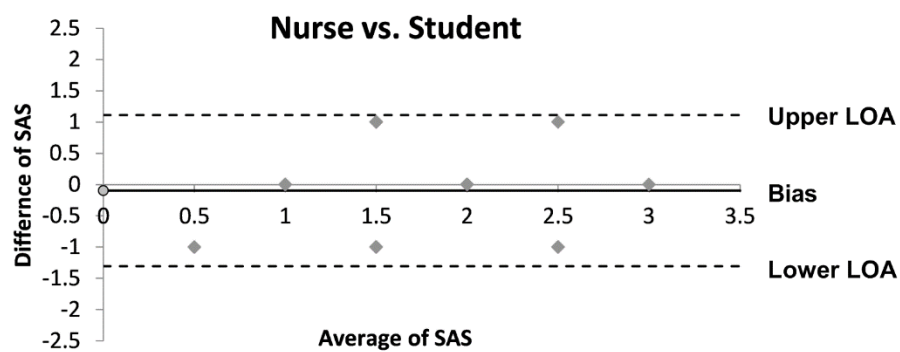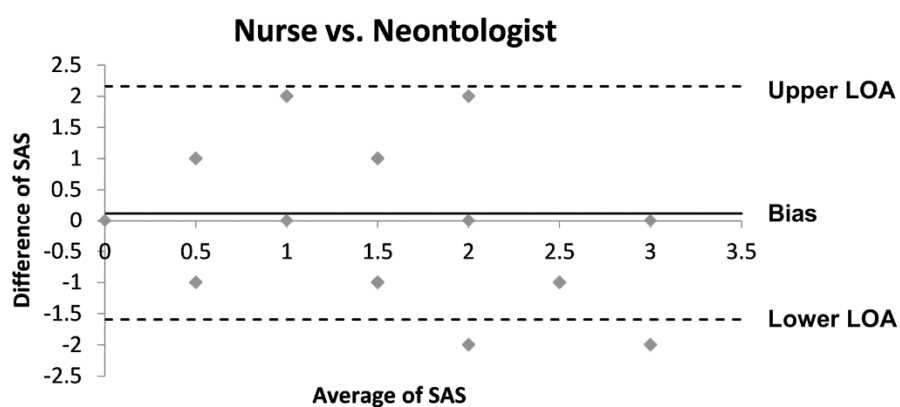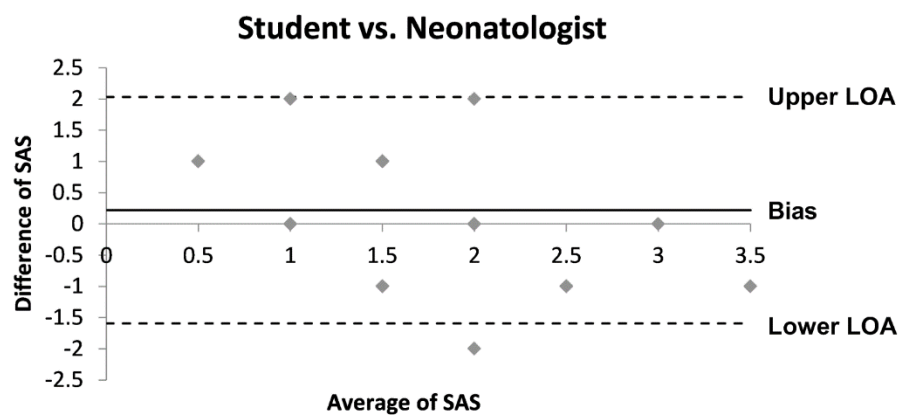

Figure S1) Bland-Altman Diagram of SAS evaluated by three independent raters.
